# Supplementary material for: Phylogenetic analysis of plant multi-domain SEC14-like phosphatidylinositol transfer proteins and structure–function properties of PATELLIN2
Source: PubMed Central journal article supplement (PMC7674337; doi:10.1007/s11103-020-01067-y), 2020-09-11
Supplement: 11103_2020_1067_MOESM1_ESM.pdf [file 11103_2020_1067_MOESM1_ESM.pdf]

**A** *Chlamydomonas reinhardtii*

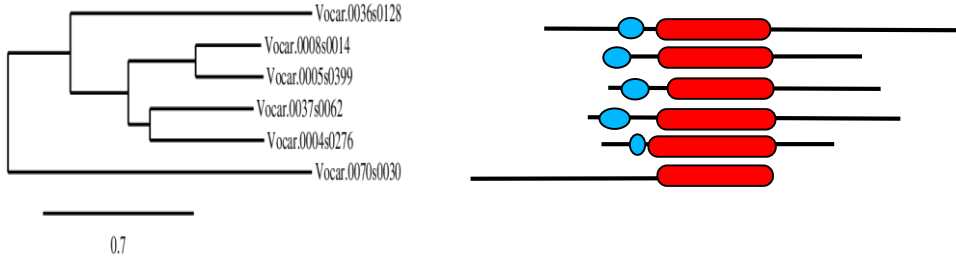

**B** *Volvox carteri*

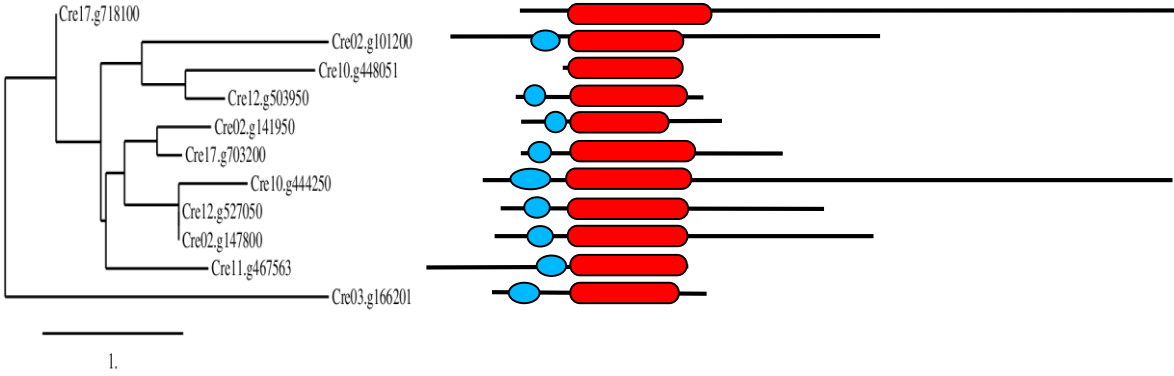

**C** *Chara braunii*

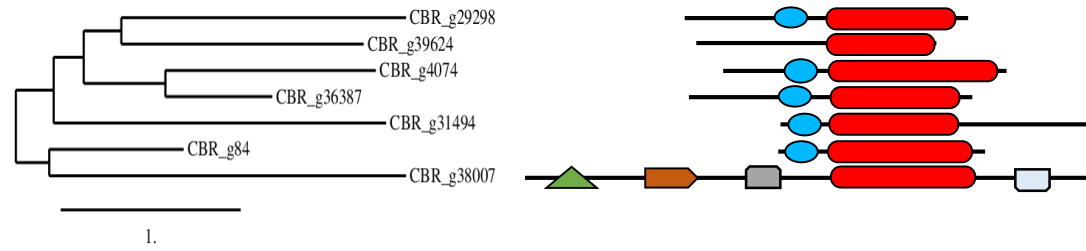

**D** *Marchantia polymorpha*

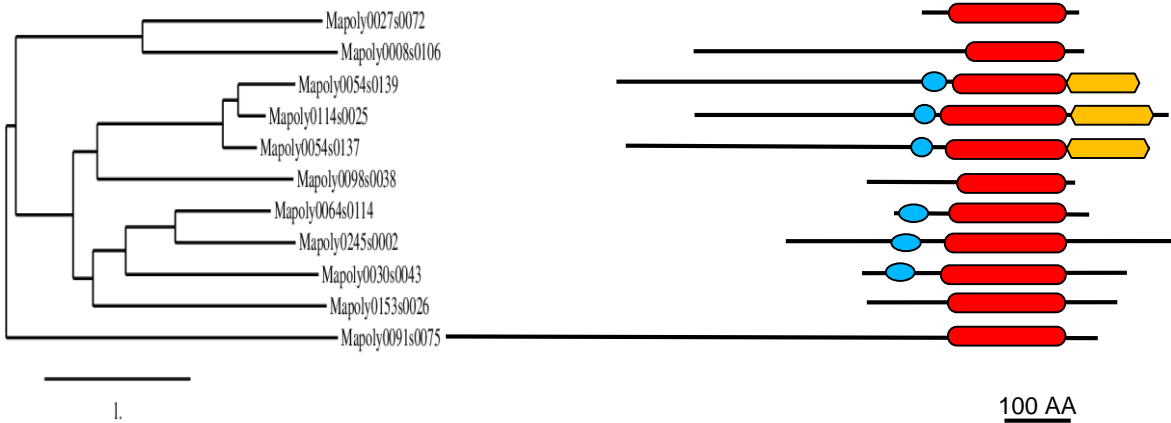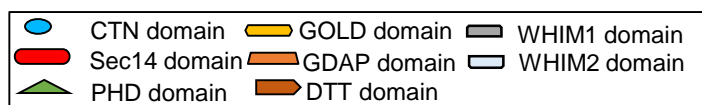

**Supplemental Figure 1. Phylogenetic analysis and modular structure of the SEC14L-PITP superfamilies in green algae and liver moss.**

Left, Phylogenetic trees, generated with full-length amino acid sequences. Right, modular structures of SEC14L-PITPs. (A) *Chlamydomonas reinhardtii*; (B) *Volvox carteri*; (C) *Chara braunii*; (D) *Marchantia polymorpha*. Different domains are represented in different color, as indicated. Protein primary structure and relative length of domains are drawn to scale.

**A** *Selaginella moellendorffii*

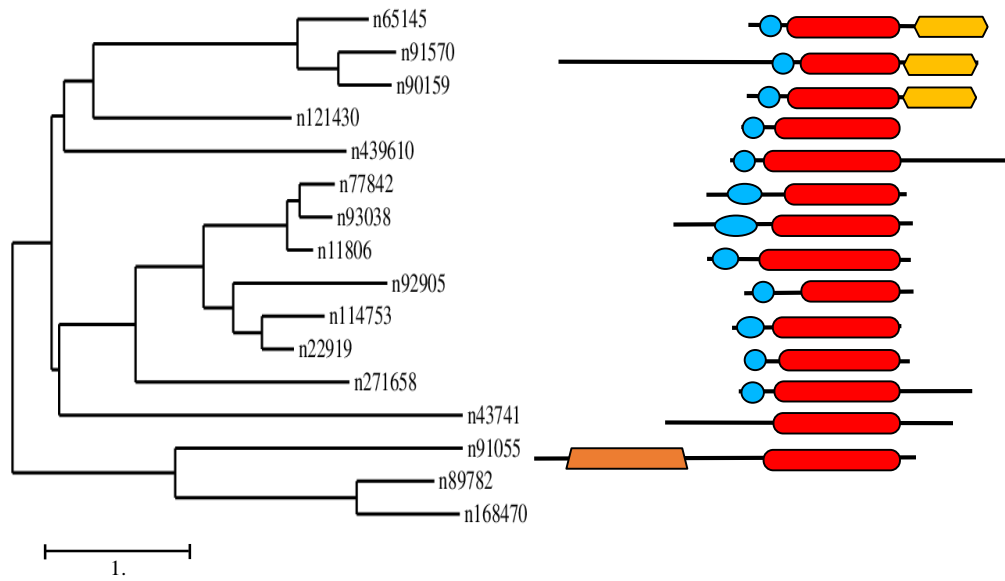

**B** *Solanum lycopersicum*

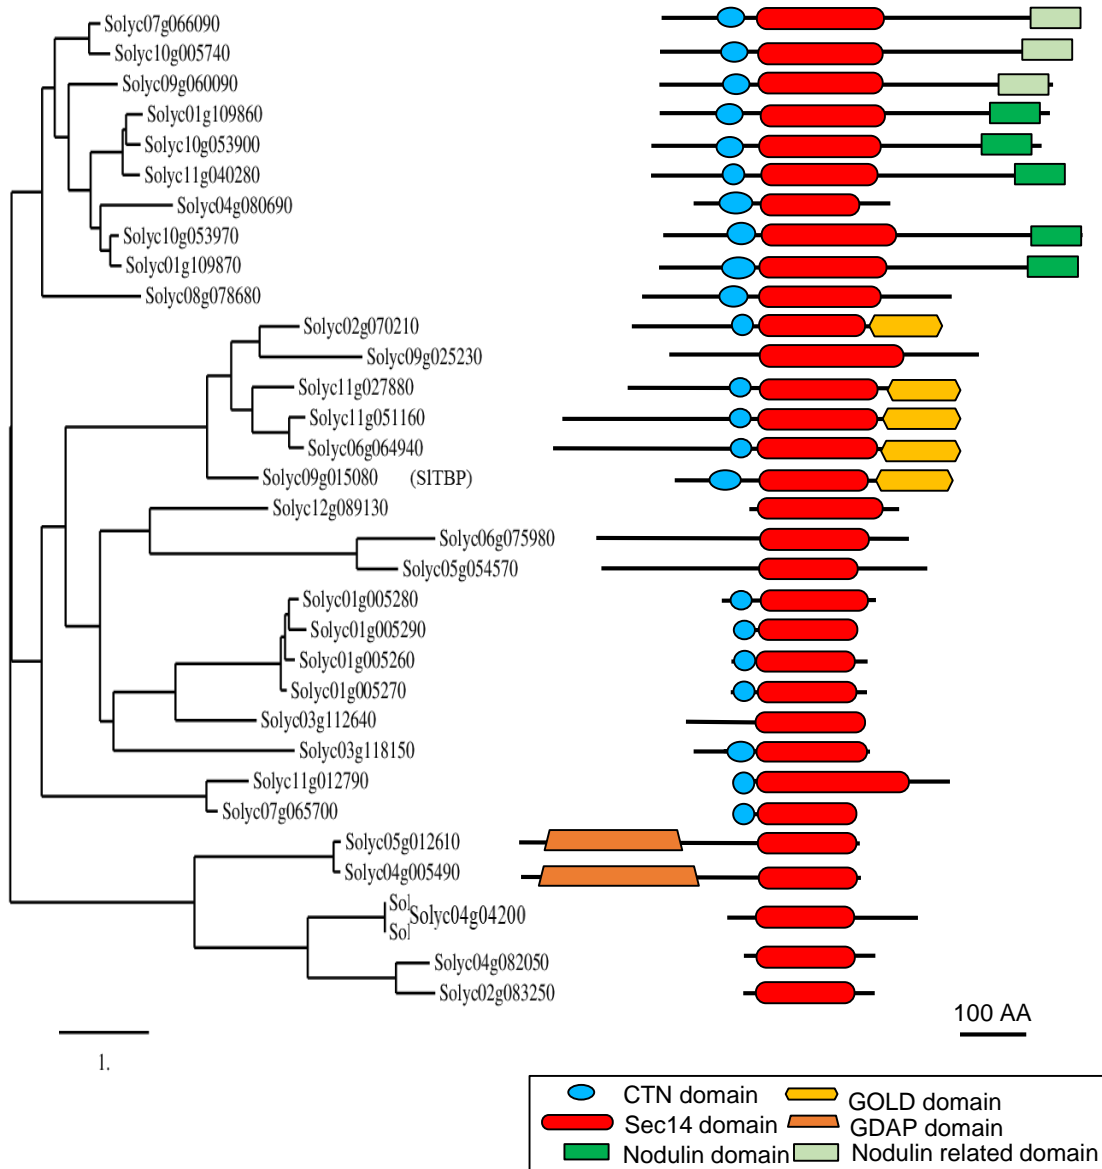

**Supplemental Figure 2. Phylogenetic analysis and modular structure of the SEC14L-PITP superfamilies in a lycophyte and eudicot tomato.**

Left, Phylogenetic tree, generated with full-length amino acid sequences. Right, modular structures of SEC14L-PITPs. (A) *Selaginella moellendorffii*; (B) *Solanum lycopersicum*. Different domains are represented in different color, as indicated. Protein primary structure and relative length of domains are drawn to scale.

*Zea mays*

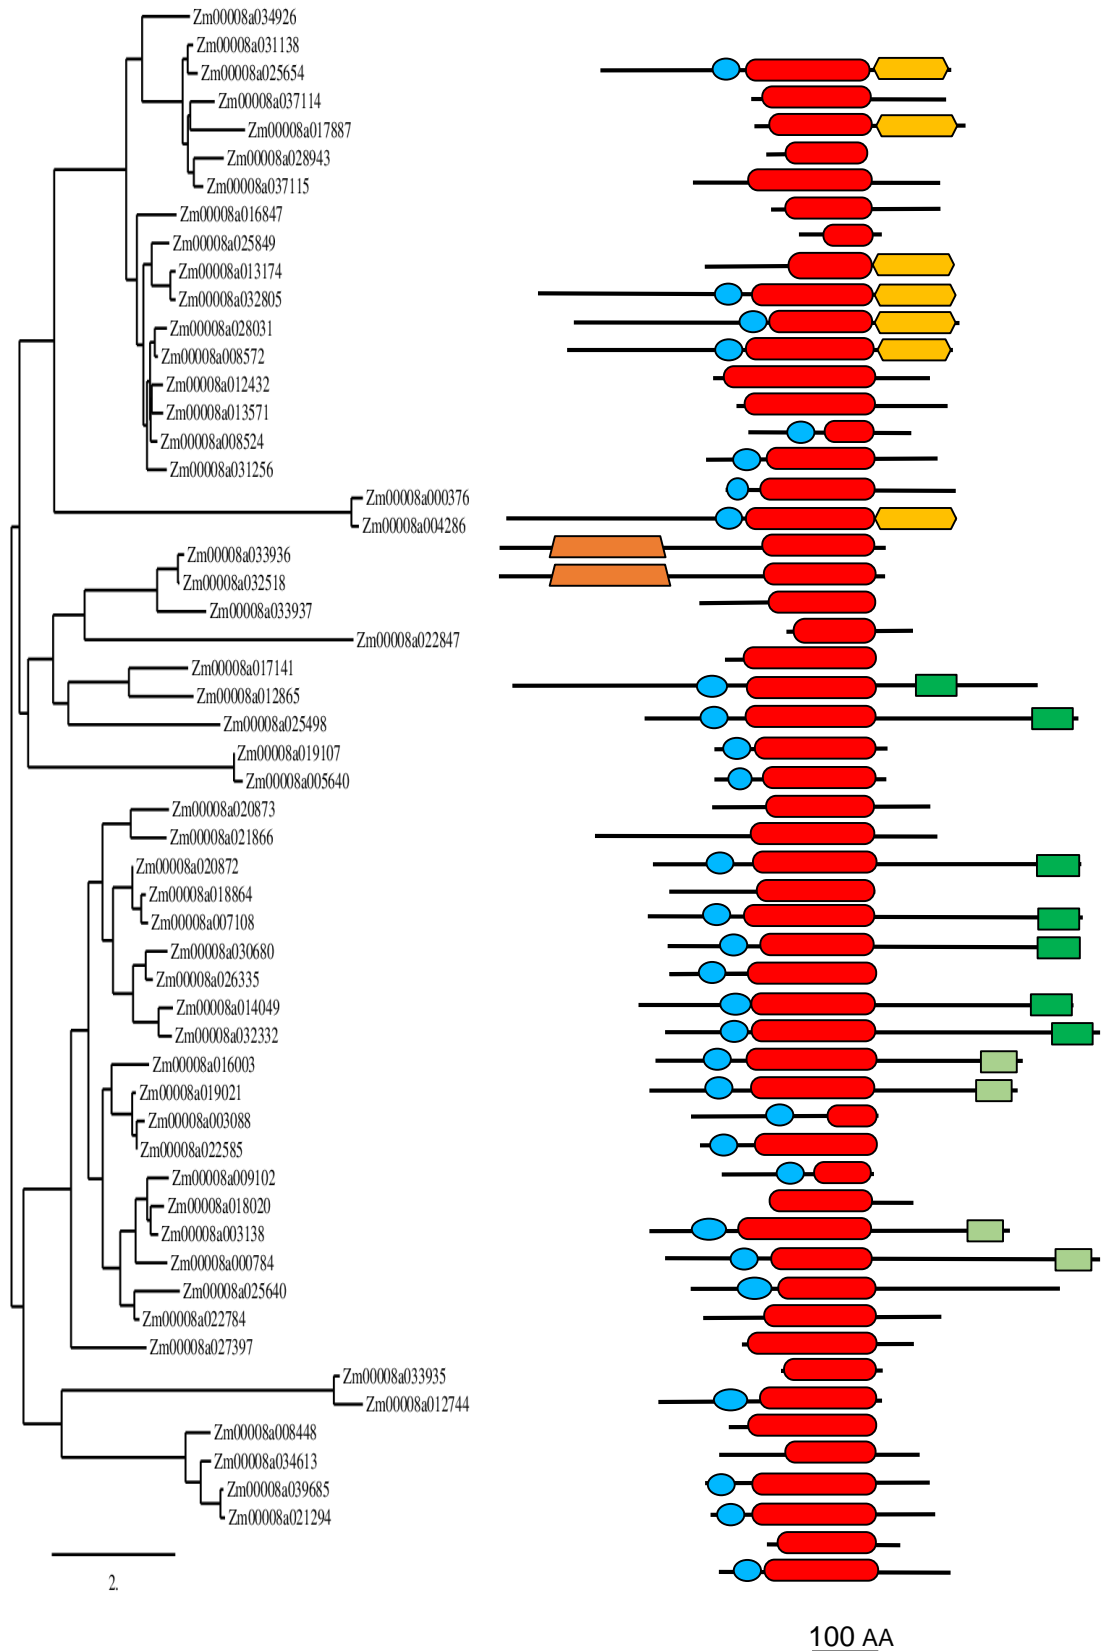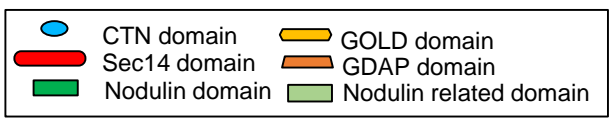

**Supplemental Figure 3. Phylogenetic analysis and modular structure of the SEC14L-PITP superfamily in monocot maize (*Zea mays*).**

Left, Phylogenetic tree, generated with full-length amino acid sequences. Right, modular structures of SEC14L-PITPs. Different domains are represented in different color, as indicated. Protein primary structure and relative length of domains are drawn to scale.

```

AtPATL4 -----MTAEVVKVEEKQVESEVVIAPAVVPEETVRAVVEETKVEED
AtPATL1 MAQEEVQKSDADVAAPVV--KEKPIDDKVEITPTVPAEKEEVAAPVSDERAVPEKEVTPK
AtPATL2 MAQEEIQKP--TASVPPVKEETPAPVKEVEVPVTEKKAAPAPAEATEKEVVSVAVPE
AtPATL6 -----
AtPATL3 -----MADEPTTTTLVTPKLPSP
AtPATL5 ---MSQDSATTTTPPPPLTSDVSMPSGEEDEPKHVTSEEAAPVTEATNLKPLMPELES

AtPATL4 ESKPEGVE-----KSASFKEESDFADLKESEKKALSDLKSLEEAIVDNTLLK-
AtPATL1 EAPAAAEKKSVSVKE--EETVVVAEKVVVLTAEVQKKALEEFKELVREALNKRFTA-
AtPATL2 EVTAVKEEVAATGKEI-LQSESFKEEGLASELQEAENALAEKELVREALNKRFTA-
AtPATL6 -----
AtPATL3 SLTPSEVS-----ESTQDALPTETETLEKVTETN-
AtPATL5 NHTAEVVSEKVTPEMTLESEGLNHAADSEQTHEVTPETETAKEVLNHTAEDSEQTH-

AtPATL4 -----TKKKESSPM-----KKEKKEEVKPEAEVEKKEEAAEKVEEKKSEAVV-
AtPATL1 -----FVTPVKEEKEE-----KKEEETKKEEKEEKEEETTEVVEEKEKPAVP-
AtPATL2 PPPPAPVKEEKEE-----KKEEETKKEEKEEKEEKEEETTEVVEEKEKPAVP-
AtPATL6 -----MDASLSPF-----DHQKQNTPEKKSFI-----
AtPATL3 -----PEETAADTTKPE-----EETAAEHHPPTVETETASTEKQEVKDEASQEV-
AtPATL5 --EVTPEKTVKSEFLNHVAEDSEQTHEVTPETETVSEVLNHAADSEQPRGVTPTPET

AtPATL4 -----TEEAPKAETVE
AtPATL1 -----AAEEKKSSEAA
AtPATL2 EEILAAPAPIVAETKKEETPVAPAPVETKPAAPVVAETKKEEILPAAPVTETKVEEKVV
AtPATL6 -----
AtPATL3 -----
AtPATL5 ETSEADTSLLVSTETEPNHAADYSETEPSQKLMLEQRKRYMEVEDWTEPELPDPAVLE

AtPATL4 AVVTEEIIIP-----
AtPATL1 PVETKSEK-----
AtPATL2 PVETTPAAPVTTETKKEEKAAPVTTETKKEEKAAPEGTKKEEKATASTQVRRASRFIKDI
AtPATL6 -----
AtPATL3 -----
AtPATL5 AAASVPEPK-----QPEPQTPPPPPSTTTSTVASR

AtPATL4 -----KEEVTTVVEKVEEETKKEEKKTEDVVTVEVKAETIEVED---EDE
AtPATL1 -----PEEKAEVTEKASSAEDDGTVEAIEEESIVSPPESAAPVAVVET
AtPATL2 FVSVTTSEKKEEKEKPAVVTIEKAFADQEEETKVEAVEESIVSITLPEA-----AY-
AtPATL6 -----TSLITLRSNNIKEDTYFVSELKPTQKSLDELKPK-----LSA
AtPATL3 -----AEEKKSMIPQNLGSKFKEESSKLSDLNSEKKSDELKRL-----VRE
AtPATL5 SLAEMMNREAEVEEKQKIQIPRSLGSKFEETNKISDLSETELELDELKRL-----LQV
          :* :
          :* :

AtPATL4 -----SVDKDIELWGVPLLPKGAEEVIVILLKFLRARDFKVNEAFEMLKKTLKWRK
AtPATL1 VAVAEAEVPEEVSINWVPLL---QDERSDVLTKFLRARDFKVEKALTMLKNTVQWRK
AtPATL2 -----VEPEEVSINWVPLL---EDERSDVLTKFLRARDFKVEKALTMLKNTVQWRK
AtPATL6 -----SSSKASSMVGVSLL---GGDDKADVILLKFLRARDFKVADSLRMLKCLEWRE
AtPATL3 ALDNRHQFTNTPPEVKIWIPIPL---EDDRSDVLLKFLRAREFKVDSFAMLRNTIKWRK
AtPATL5 S-----QDSSKTSINWVPLL---KDDRTDVLLKFLRARDFKVQEAYSMLNKTLOWRI
          . :*: :
          . :*: :

AtPATL4 QNKIDSLIIEEFG-EDLA-TAAYMNGVDRESHFVCYNVHSE---ELYQ-TIGSEKNREK
AtPATL1 ENKIDELVSEEEVSEFE-KMVFAGVDMEGHVVIYSSYGFQNKEL---FSDKELNK
AtPATL2 ENKIDDLVSEDEGSEFE-KLVFTHGVDKQGHVVIYSSYGFQNKEL---FSDKELSK
AtPATL6 EFKIIEEEDLGLKDLGKLVAYMRGYDKGHPVCYNAYGVFKEKEMRYRFVGDDEKLNK
AtPATL3 EFKIDELVSEEDLV-DDLD-KVVMHGHDRGHPVCYNVYGFQNKELYNRTFSDEEKRRH
AtPATL5 DFNIEEELIENLG-DDLD-KVVMQGDKNHFPVCYNVYGFQNKELDYQRTFSDEEKRRH
          : : : : :
          : : : : :
          : : : : :
          : : : : :
          : : : : :

AtPATL4 FLRWRFLMEKGIQKLNK-PGGVTSLLQIHDLNKAPGVSRTIIVGKIKVIE TLQDNYP
AtPATL1 FLSWRIQLQEKVRAIDFSNPEAKSSFFVVDPRNAPGLGKRALWQFIRRAVKQFEDNYP
AtPATL2 FLWRIQFQEKCVRLDFS-PEAKSSFFVVDPRNAPGLGKRALWQFIRRAVKQFEDNYP
AtPATL6 FLHWVQVLERGVRLHFK-PGVNSIIQVTDLKDMP---KRELVAASQNLISLFDQDNYP
AtPATL3 FLRTIQLERSIRKLDFS-SGGVSTIQVNDMKNSPGLGKRELRSATQAVELLQDNYP
AtPATL5 FLWRIQFLEKSIKLDV-AGGVSTIQVNDLKNSPGPKTELRALATQALHLLQDNYP
          ** * . . : : : : :
          ** * . . : : : : :
          ** * . . : : : : :
          ** * . . : : : : :
          ** * . . : : : : :

AtPATL4 EFVSRNIFINVPWFYAMRAVLSPFIL-QRTKSKFVVARPARVRETLKRYIPADELFPVQY
AtPATL1 EFAAKELFINVPWYIPIYKTFGSIITSPRTSKMVLGSPKSAETIFRYIAPEQVFPVY
AtPATL2 EFVAKELFINVPWYIPIYKTFGSIITSPRTSKMVLGSPKSAETIFRYIAPEQVFPVY
AtPATL6 ELVAKIFINVPWYFVYISMFSPFILT-QRTKSKFVMSKGNAAETLYKFIREDIPVQY
AtPATL3 EFVFKQAFINVPWYLVFYTVIGPFMT-PRSKSLVFAGPSRSETLFRYISPEQVFPVQY
AtPATL5 EFVSRQIFINVPWYLAFYRIISPFMS-QRSKSLVFAGPSRSAETLLRYISPEHVPVQY
          * : : : : :
          * : : : : :
          * : : : : :
          * : : : : :
          * : : : : :

AtPATL4 GGFK---TVDDTEFS-NETVSEVVVKPGSSETIEIPAPETEGLVWDIAVLGWEVNYKKEE
AtPATL1 GGLS-----KDTPLT-ETITEAIVKPAANYTIELP-ASEACTLSWELRVLGADVSYGAQ
AtPATL2 GGLS-----KDSPTQEDGVTEAVRSTSKYITDLP-ATEGSTLSWELRVLGADVSYGAQ
AtPATL6 GGLS---RPTDSQNGPFPKFASEFSIRGGEKVNIOIEGEGGATITWDIVVGGWDLYSAE
AtPATL3 GGLSVDCCDCNDFSLSDSASEITVKGPTQVETII-IYEKELVWEI RVTGWEVSYKAE
AtPATL5 GGLSVDNCCENSDFTHDDIATEITVKKPTKQVETII-VYEKCTIVWEI RVTGWEVSYGAE
          ** . : : : : :
          ** . : : : : :
          ** . : : : : :
          ** . : : : : :
          ** . : : : : :

AtPATL4 FVPTTEGAYTVIVQKVKMGANE GPI-RNSFKNSQAGKIVLTVDNVSGKKEKVL-YRYRT
AtPATL1 FEPTTEGSAVIVSKTRKIGSTDEPVIDTDSFKVGEFGKIVITIDNQTSKKKEKVL-YRFPK
AtPATL2 FEPSNEASYTVIVSKNRKVGLTDEPVIDTDSFKASEAGKVVITIDNQTFRKKEKVL-YRSPK
AtPATL6 FVFNAAESYAVIVEKPKMKATDEAV-CNSFTVEAGKLLISVDNLSRKKKVAAYRYTV
AtPATL3 FVPEEKDAYTVVIQPRKMRPSDEPVLTHSFVNLGKVLVTDNPSRKKKVL-YRFNV
AtPATL5 FVPEKKEGYTVIIQPRKMTAKNELVVSHSFKVGEVGRILLTVDNPSRKMILI-YRFKV
          * * : : : : :
          * * : : : : :
          * * : : : : :
          * * : : : : :
          * * : : : : :

AtPATL4 KTESSS-
AtPATL1 Q-----
AtPATL2 QA-----
AtPATL6 RKSTTV
AtPATL3 KPL----
AtPATL5 KPLACE-

```

### Supplemental Figure 4. Alignment of Arabidopsis PATL protein sequences.

The start of different domains is indicated by a box, in blue, CTN, in red, SEC14, in yellow, GOLD domain. The colors of amino acid letters represent red, hydrophobic; green, polar uncharged; pink, basic; blue, acidic amino acids.

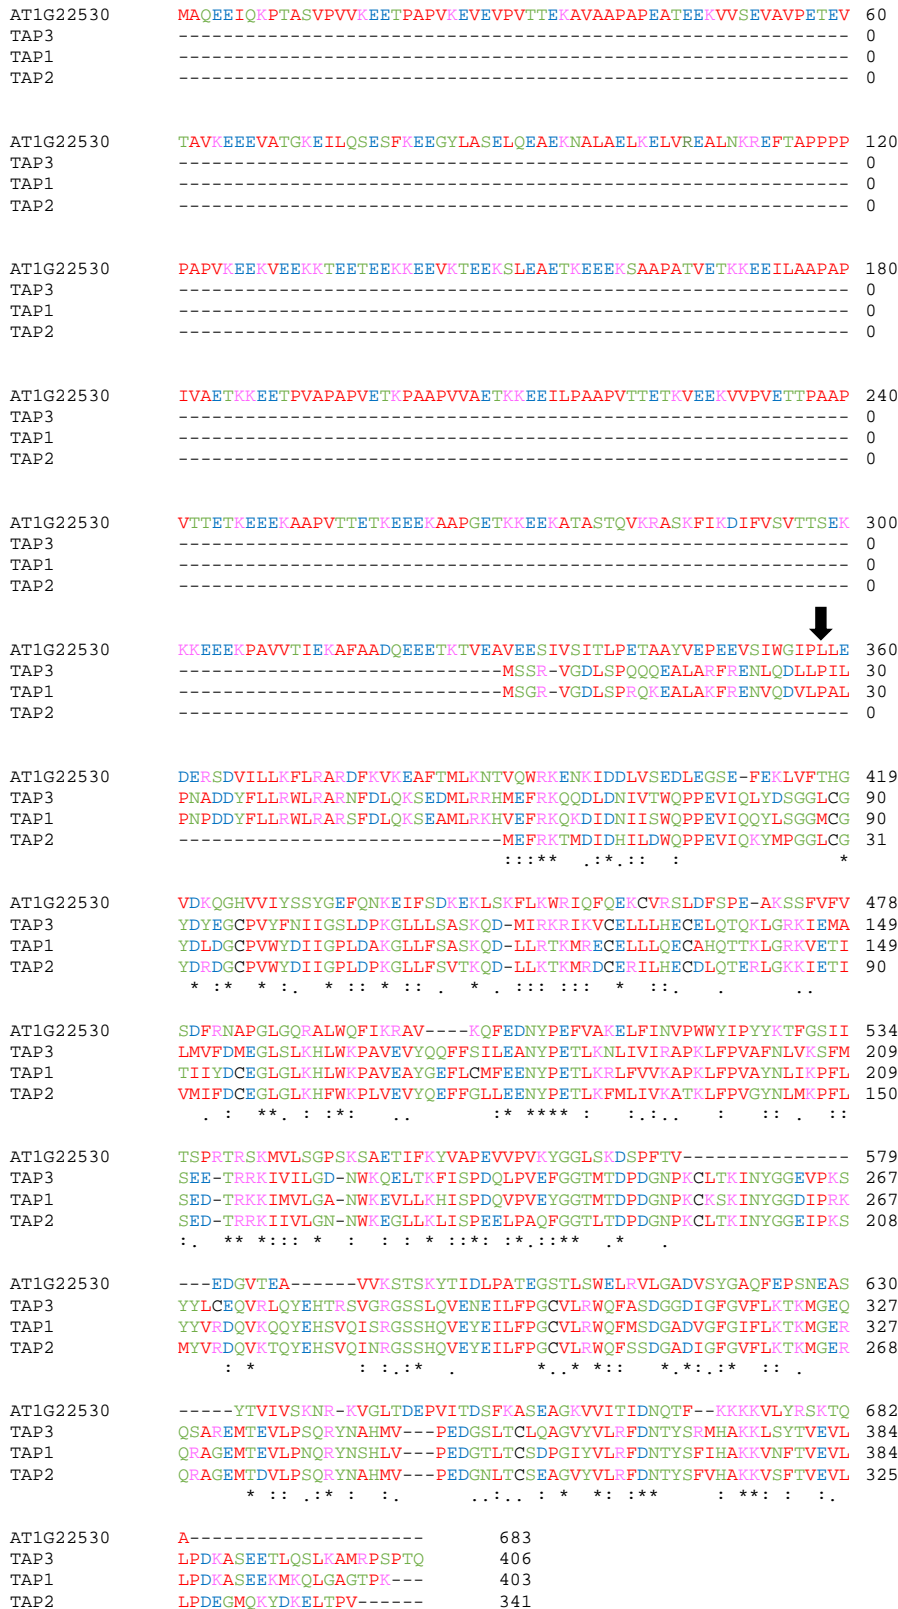

**Supplemental Figure 5. Alignment of AtPATL2 with human TAP protein sequences.**

The start of the CTN-SEC14-GOLD region is indicated by an arrow. The colors of amino acid letters represented, hydrophobic; green, polar uncharged; pink, basic; blue, acidic amino acids.



**A**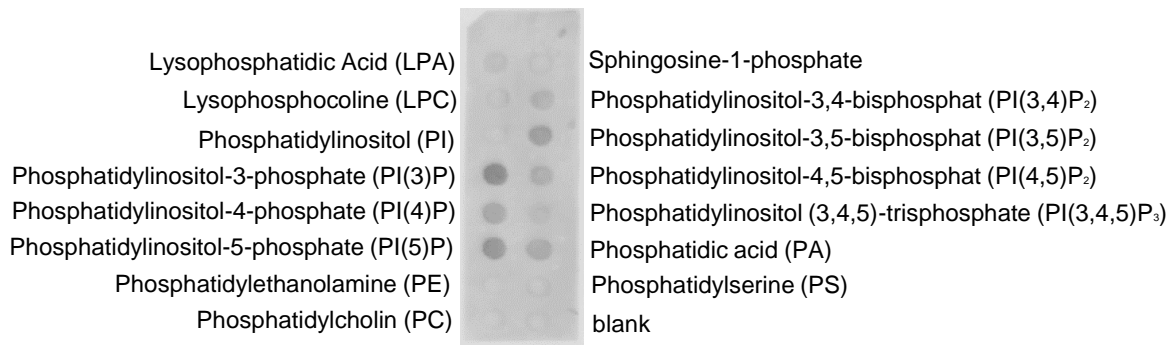**B**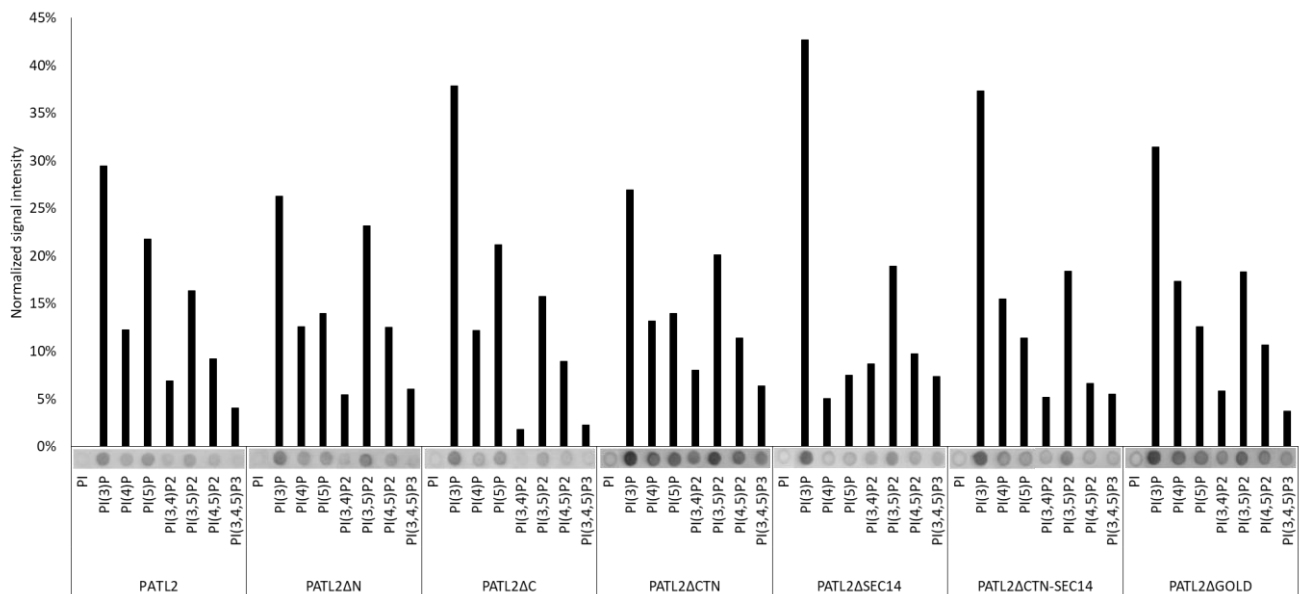**C**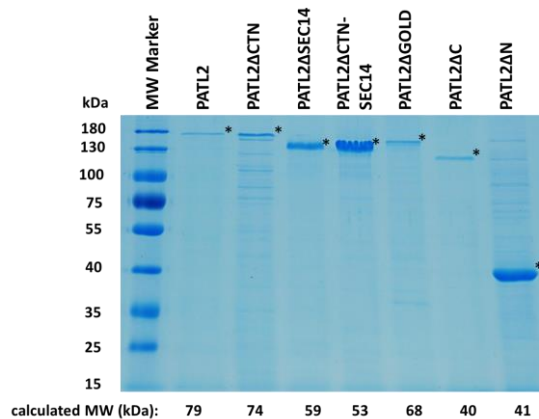

**Supplemental Figure 6. Protein–phosphoinositide overlay assay and electrophoretic migration behavior of StrepII-PATL2 and deletion mutants.**

(A, B) StrepII-PATL2 and deletion mutant protein–phospholipid overlay assay. PIP binding is quantified in (B). (C) Electrophoretic migration behavior of StrepII-PATL2 and deletion mutant proteins, analyzed by in SDS-PAGE, followed by Coumassie staining. StrepII-PATL2 and deletion mutant protein bands are indicated by an asterisk. The theoretical masses of StrepII-PATL2 and deletion mutants are indicated below. In the presence of the N-terminal domain, migration of proteins is drastically retarded, presumably due to the acidic character of the N-terminal part, as reported before (Peterman et al., 2004; Armstrong and Roman, 1993).

**Supplemental Table S1. List of genes in coexpression modules**

| <b>AGI number</b>                                      | <b>Name</b> | <b>description</b>                                               |
|--------------------------------------------------------|-------------|------------------------------------------------------------------|
| <b>The genes in <i>PATL1-4</i> coexpression module</b> |             |                                                                  |
| At1g72150                                              | PATL1       | PATELLIN1                                                        |
| At1g22530                                              | PATL2       | PATELLIN2                                                        |
| At1g72160                                              | PATL3       | PATELLIN3                                                        |
| At2g17550                                              | TRM26       | TON1 RECRUITING MOTIF 26                                         |
| At1g61100                                              |             | disease resistance protein                                       |
| At5g40450                                              | RBB1        | REGULATOR OF BULB BIOGENESIS1                                    |
| At4g33740                                              |             | MYB-like transcriptioin factor                                   |
| At3g27960                                              | KLCR2       | KINESIN LIGHT CHAIN-RELATED 2                                    |
| At2g01910                                              | MAP65-6     | Microtubule-associated protein                                   |
| At1g14380                                              | IQD28       | IQ-DOMAIN 28                                                     |
| At4g16563                                              |             | aspartyl protease                                                |
| At2g30930                                              |             | hypothetical protein                                             |
| At4g20260                                              | PCAP1       | PLASMA-MEMBRANE ASSOCIATED CATION-BINDING PROTEIN 1              |
| At2g48030                                              |             | DNase-I-like                                                     |
| At2g36410                                              | DUF662      | transcriptional activator                                        |
| At1g64390                                              | GH9C2       | GLYCOSYL HYDROLASE 9C2                                           |
| At1g53730                                              | SRF6        | STRUBBELIG RECEPTOR FAMILY6                                      |
| At1g30690                                              | PATL4       | PATELLIN4                                                        |
| At3g12110                                              | ACT11       | ACTIN11                                                          |
| At1g03870                                              | FLA9        | FASCICLIN-LIKE ARABINOOGALACTAN 9                                |
| At5g16590                                              | LRR1        | LEUCINE RICH REPEAT PROTEIN 1                                    |
| At1g67750                                              |             | Pectate lyase                                                    |
| At4g12730                                              | FLA2        | FASCICLIN-LIKE ARABINOOGALACTAN 2                                |
| At4g22010                                              | SKS4        | SKU5 SIMILAR4                                                    |
| At1g04680                                              |             | Pectin lyase-like                                                |
| At3g54400                                              |             | Aspartyl protease                                                |
| At5g15350                                              | ENODL17     | EARLY NODULIN-LIKE PROTEIN 17                                    |
| At4g12420                                              | SKU5        | protein of unknown function involved in directed root tip growth |
| <b>The genes in <i>PATL6</i> coexpression module</b>   |             |                                                                  |
| At1g27190                                              | BIR3        | BAK1-INTERACTING RECEPTOR-LIKE KINASE 3                          |
| At1g70940                                              | PIN3        | PIN-FORMED 3                                                     |
| At2g38120                                              | WAV5 (AUX1) | AUXIN RESISTANT 1                                                |
| At3g05100                                              | transferase | SAM methyl transferase                                           |
| At1g75500                                              | WAT1        | WALLS ARE THIN 1 transporter                                     |
| At4g12110                                              | SMO1-1      | STEROL-4ALPHA-METHYL OXIDASE 1-1                                 |
| At3g51670                                              | PATL6       | PATELLIN6                                                        |

**Supplemental Table S2. Information on the generation of PATL2 deletion mutants.**

| <b>PATL2 deletion mutant</b> | <b>AA position</b> | <b>Predicted molecular weight (kDa)</b> | <b>predicted molecular weight stepII-tagged (kDa)</b> | <b>Molecular running weight stepII-tagged (kDa)</b> |
|------------------------------|--------------------|-----------------------------------------|-------------------------------------------------------|-----------------------------------------------------|
| PATL2                        | 1-683              | 76                                      | 79                                                    | ~ 170                                               |
| PATL2ΔN                      | 358-683            | 38                                      | 41                                                    | ~ 40                                                |
| PATL2ΔCTN                    | 1-357; 403-683     | 71                                      | 74                                                    | ~ 170                                               |
| PATL2ΔSEC14                  | 1-402; 577-684     | 56                                      | 59                                                    | ~ 160                                               |
| PATL2ΔCTN-SEC14              | 1-357; 577-685     | 50                                      | 53                                                    | ~ 160                                               |
| PATL2ΔGOLD                   | 1-579              | 65                                      | 68                                                    | ~ 120                                               |
| PATL2ΔC                      | 1-357              | 37                                      | 40                                                    | ~ 160                                               |

**Supplemental Table S3. Primers used in this study.**

| <b>Primer</b>     | <b>Sequence (5'-3')</b>                              |
|-------------------|------------------------------------------------------|
| PATL2B1F_N        | GGGGACAAGTTTGTACAAAAAAGCAGGCTTTATGGCTCAAGAAGAGATACAG |
| PATL2B2stopR      | GGGGACCACTTTGTACAAGAAAGCTGGGTTTATGCTTGGGTTTTGGACC    |
| PATL2ΔGOLDstopB2  | GGGGACCACTTTGTACAAGAAAGCTGGGTTTAAACGGTGAATGGAC       |
| PATL2ΔSEC14_F     | ATCGACGACCTAGTCTTCACCGTTGAAGAT                       |
| PATL2ΔSEC14_R     | ATCTTCAACGGTGAAGACTAGGTCGTCGAT                       |
| PATL2ΔCTN-SEC14_F | ATCTGGGGAATCCCATTACCGTTGAAGAT                        |
| PATL2ΔCTN-SEC14_R | ATCTTCAACGGTGAATGGGATCCCCAGAT                        |
| PATL2ΔCTN_F       | CAATCTGGGGAATCCCATCAGAAGATCTTGA                      |
| PATL2ΔCTN_R       | TCAAGATCTTCTGATGGGATCCCCAGATTG                       |
| PATL2ΔCstopB2     | GGGGACCACTTTGTACAAGAAAGCTGGGTTTATGGGATCCCCAGATTGAGAC |
| PATL2ΔNB1_N       | GGGGACAAGTTTGTACAAAAAAGCAGGCTTTCTTCTAGAGGACGAAAGATCC |
| PATL2_F_BamHI     | AGGAGTGGATCC T ATGGCTCAAGAAGAGATACAG                 |
| PATL2_R_NotI      | AGGAGTGC GGCCGC TTA TGCTTGGGTTTTGGACC                |
| PATL2ΔGOLD_R_NotI | AGGAGTGC GGCCGC TTA AACGGTGAATGGACTATC               |
| PATL2ΔN_F_BamHI   | AGGAGTGGATCC T CTTCTAGAGGACGAAAGATCC                 |
| PATL2ΔC_R_NotI    | AGGAGTGC GGCCGC TTA TGGGATCCCCAGATTG                 |
